# Supplementary material for: Construction of a TiO2/BiOCl heterojunction for enhanced solar photocatalytic oxidation of nitric oxide
Source: Royal Society of Chemistry journal article supplement (doi:10.1039/d3dt00082f), 2023-01-01
Supplement: d3dt00082f1.pdf [file d3dt00082f1.pdf]

**Construction of TiO<sub>2</sub>/BiOCl heterojunction for enhanced solar photocatalytic  
oxidation of nitric oxide**

Wei Zhao<sup>\*,a</sup>, Huixian Wang<sup>a</sup>, Haiwen Wang<sup>a</sup>, Dingwen Zhang<sup>a</sup>, Qian Wang<sup>a</sup>, Qin Zhong<sup>b</sup>, Danhong  
Shang<sup>c</sup>

<sup>a</sup> School of Energy & Power Engineering, Jiangsu University, Zhenjiang 212013, P.R.  
China

<sup>b</sup> Nanjing University of Science and Technology, Nanjing 210094, P.R. China

<sup>c</sup> School of Environmental and Chemical Engineering, Jiangsu University of Science and  
Technology, Zhenjiang, 212013, PR China

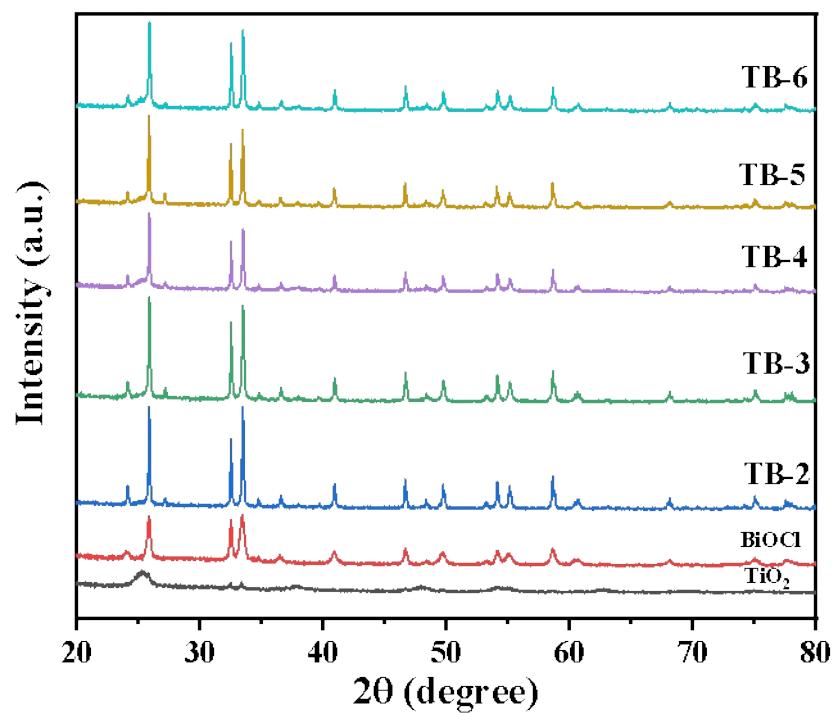

**Figure S1.** XRD patterns of BiOCl, TiO<sub>2</sub>, TB-2, TB-3, TB-4, TB-5 and TB-6.

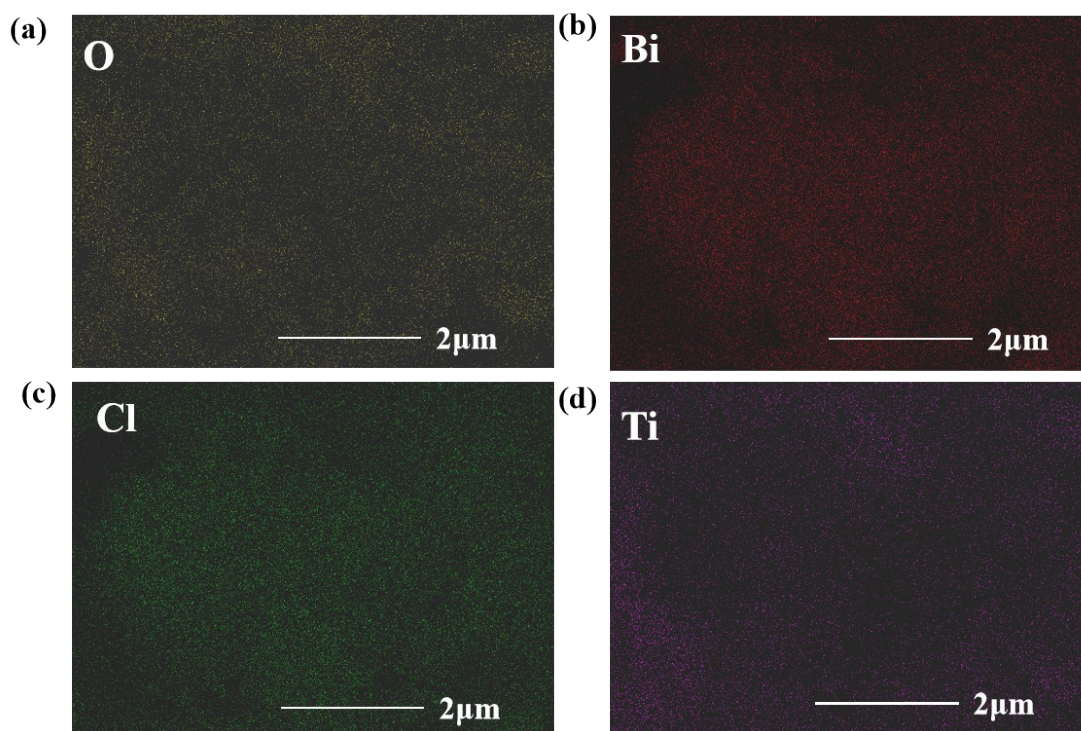

**Figure S2.** EDS mapping images for O element (a), Bi element (b), Cl element (c), and Ti element (d).

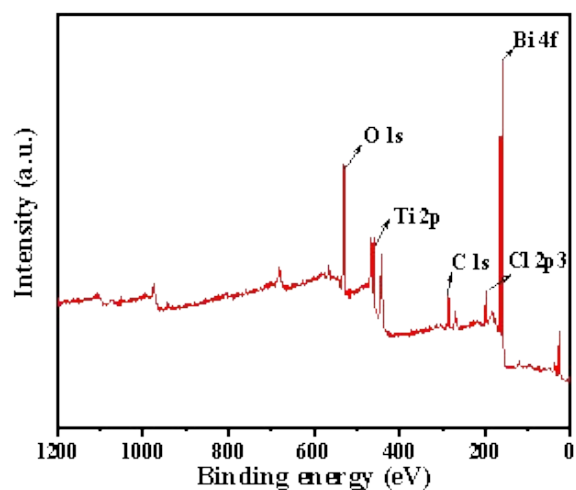

**Figure S3.** XPS survey spectra of TB-4.

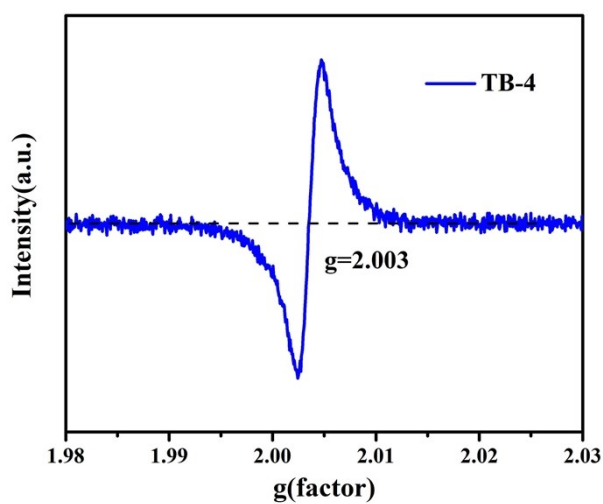

**Figure S4.** EPR spectrum of TB-4.

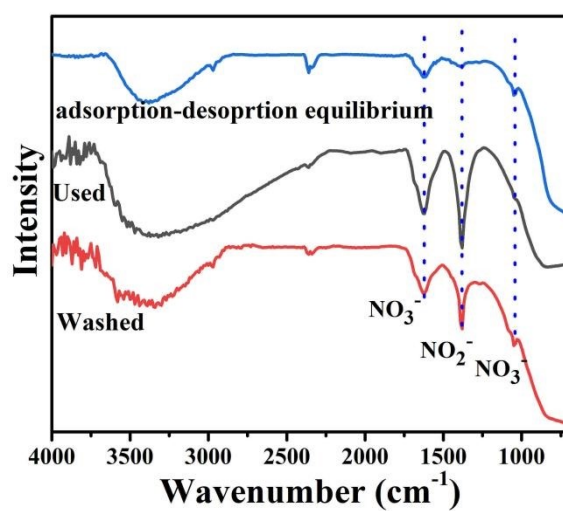

**Figure S5.** FT-IR spectra of TB-4 before and after photocatalytic reaction.

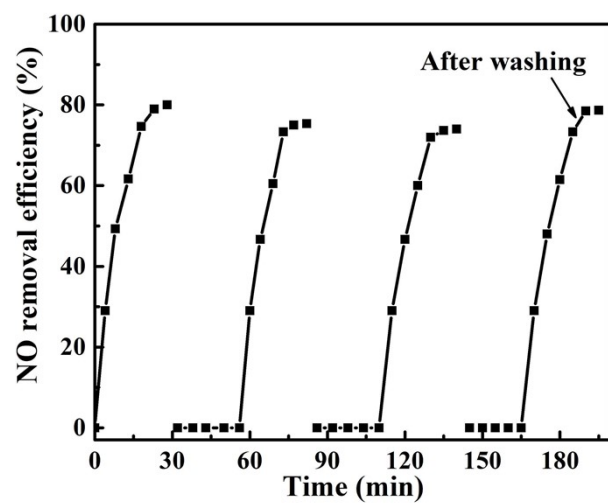

**Fig. S6.** NO removal activity of the TB-4 composite in three consecutive cycles and after washing.

**Table S1. Photocatalytic removal of NO under different system.**

| Sample                                                      | NO removal efficiency (%) | Reference               |
|-------------------------------------------------------------|---------------------------|-------------------------|
| OVs-BiOCl                                                   | 36.4                      | Reference <sup>1</sup>  |
| BiOCl/CuBi <sub>2</sub> O <sub>4</sub>                      | 40                        | Reference <sup>2</sup>  |
| g-C <sub>3</sub> N <sub>4-x</sub> /BiOCl/WO <sub>2.92</sub> | 68.7                      | Reference <sup>3</sup>  |
| BiOCl/Bi <sub>2</sub> WO <sub>6</sub>                       | 31                        | Reference <sup>4</sup>  |
| BiOCl-OVs/g-C <sub>3</sub> N <sub>4</sub>                   | 66.5                      | Reference <sup>5</sup>  |
| N-BiOCl                                                     | 60                        | Reference <sup>6</sup>  |
| TiO <sub>2</sub> -C <sub>3</sub> N <sub>5</sub>             | 67.1                      | Reference <sup>7</sup>  |
| TiO <sub>2</sub> -B-400                                     | 70.1                      | Reference <sup>8</sup>  |
| OV-TiO <sub>2</sub> -325                                    | 45                        | Reference <sup>9</sup>  |
| Bi/BiOI/black TiO <sub>2</sub>                              | 70                        | Reference <sup>10</sup> |
| <b>TiO<sub>2</sub>/BiOCl</b>                                | <b>83</b>                 | <b>This work</b>        |

---

## References

1. Liao, J.; Li, K.; Ma, H.; Dong, F.; Zeng, X.; Sun, Y., Oxygen vacancies on the BiOCl surface promoted photocatalytic complete NO oxidation via superoxide radicals. *Chinese Chemical Letters* **2020**, *31*, (10), 2737-2741.
2. Wu, S.; Yu, X.; Zhang, J.; Zhang, Y.; Zhu, Y.; Zhu, M., Construction of BiOCl/CuBi<sub>2</sub>O<sub>4</sub> S-scheme heterojunction with oxygen vacancy for enhanced photocatalytic diclofenac degradation and nitric oxide removal. *Chemical Engineering Journal* **2021**, *411*.
3. Wang, M.; Tan, G.; Feng, S.; Dang, M.; Wang, Y.; Zhang, B.; Ren, H.; Lv, L.; Xia, A.; Liu, W.; Liu, Y., Defects and internal electric fields synergistically optimized g-C<sub>3</sub>N<sub>4-x</sub>/BiOCl/WO<sub>2.92</sub> heterojunction for photocatalytic NO deep oxidation. *J Hazard Mater* **2021**, *408*, 124897.
4. Wang, W.; Wen, C.; Guan, J.; Man, H.; Bian, J., Insight on photocatalytic oxidation of high concentration NO over BiOCl/Bi<sub>2</sub>WO<sub>6</sub> under visible light. *Journal of Industrial and Engineering Chemistry* **2021**, *103*, 305-313.
5. Wang, M.; Wang, B.; Xie, B.; Li, N.; Xu, Q.; Li, H.; He, J.; Chen, D.; Lu, J., Ultrathin Two-Dimensional BiOCl with Oxygen Vacancies Anchored in Three-Dimensional Porous g-C<sub>3</sub>N<sub>4</sub> to Construct a Hierarchical Z-Scheme Heterojunction for the Photocatalytic Degradation of NO. *Industrial & Engineering Chemistry Research* **2021**, *61*, (1), 317-329.
6. Guo, J.; Shen, T.; Liang, J.; He, S.; Jing, Y.; Chu, Y.; Cen, W., Study on the effective removal of NO by light-driven N-BiOCl. *Fuel* **2022**, *329*.
7. Zhang, J.; Tao, H.; Wu, S.; Yang, J.; Zhu, M., Enhanced durability of nitric oxide removal on TiO<sub>2</sub> (P25) under visible light: Enabled by the direct Z-scheme mechanism and enhanced structure defects through coupling with C<sub>3</sub>N<sub>5</sub>. *Applied Catalysis B: Environmental* **2021**, *296*.
8. Li, G.; Huang, R.; Zhu, C.; Jia, G.; Zhang, S.; Zhong, Q., Effect of oxygen vacancies and its quantity on photocatalytic oxidation performance of titanium dioxide for NO removal. *Colloids and Surfaces A: Physicochemical and Engineering Aspects* **2021**, *614*.
9. Gu, Z.; Cui, Z.; Wang, Z.; Sinkou Qin, K.; Asakura, Y.; Hasegawa, T.; Hongo, K.; Maezono, R.; Yin, S., Intrinsic carbon-doping induced synthesis of oxygen vacancies-mediated TiO<sub>2</sub> nanocrystals: Enhanced photocatalytic NO removal performance and mechanism. *Journal of Catalysis* **2021**, *393*, 179-189.
10. Li, Q.; Hu, J.; Wang, H.; Wu, Z., In situ synthesis of an advanced Z-scheme Bi/BiOI/black TiO<sub>2</sub> heterojunction photocatalysts for efficient visible-light-driven NO purification. *Applied Surface Science* **2021**, *562*.
